# Supplementary material for: Unusual Placement of an EBV Epitope into the Groove of the Ankylosing Spondylitis-Associated HLA-B27 Allele Allows CD8+ T Cell Activation
Source: MDPI journal article supplement (doi:10.3390/cells8060572), 2019-06-11
Supplement: s1 [file s1]

## Supplementary materials

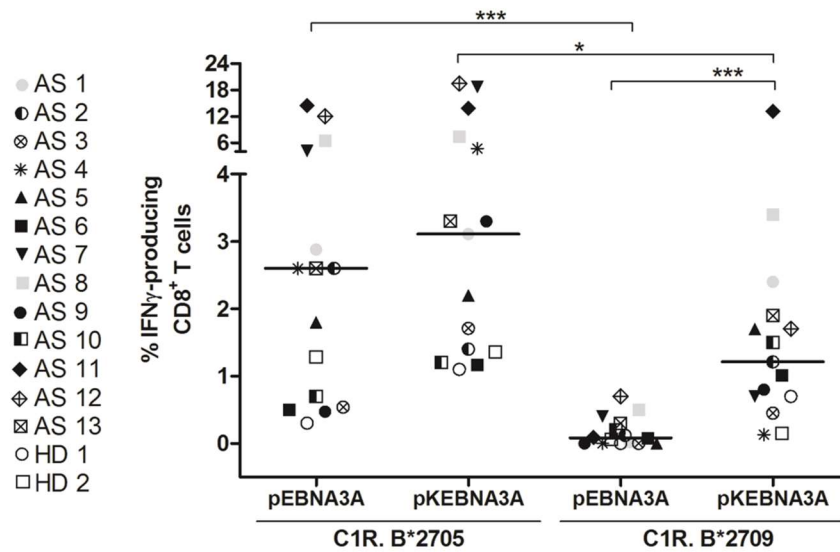

**Figure S1.** B\*2709 allele is able to present pKEBNA3A. PBMC from 15 B\*2705-positive subjects (13 patients with AS and 2 HD) were stimulated with pEBNA3A. After 12 days, their activation evaluated through the IFN $\gamma$  production, was induced by re-stimulation with C1R.B\*2705 or C1R.B\*2709 transfectants pre-pulsed with pEBNA3A or pKEBNA3A. The percentage of IFN $\gamma$ -producing CD8<sup>+</sup> T cells was compared by Mann Whitney test; \*\*\*p value<0.001, \*p value<0.05.

**Table S1. Hydrogen bonds between the peptides and the HLA-B27 binding groove.**

| GROOVE  | pEBNA3A:<br>HLA-B*2705 | pEBNA3A:<br>HLA-B*2709 | pKEBNA3A:<br>HLA-B*2705 | pKEBNA3A:<br>HLA-B*2709 | TIS:<br>HLA-B*2705 | TIS:<br>HLA-B*2709 |
|---------|------------------------|------------------------|-------------------------|-------------------------|--------------------|--------------------|
| Thr 24  |                        |                        |                         |                         | P2                 | P2                 |
| Glu 45  | P1                     |                        |                         |                         | P2                 | P2                 |
| Glu 63  | P1                     | P1                     | P1, P2                  |                         | P1, P2             | P1, P2             |
| Arg 62  |                        |                        |                         |                         | P2                 | P1                 |
| Asp 77  |                        |                        | P9                      | P9                      | P8                 | P9                 |
| Tyr 99  |                        |                        |                         |                         | P3                 | P3                 |
| Lys 146 |                        |                        |                         |                         | P9                 | P9                 |
| Trp 147 |                        |                        |                         | P10                     | P8, P9             | P8                 |
| Tyr 159 | P1                     | P1                     |                         |                         |                    | P1                 |
| Glu 163 |                        |                        |                         | P2                      | P1                 | P1                 |

On the left: amino acid residues in the binding groove involved in the H bonds. The interacting peptide residues are labeled with “P” (i.e. P1 the 1st residue, P9/P10 the last one).
